# Supplementary material
Source: PubMed Central journal article supplement (PMC4496803)
Supplement: NIHMS704806-supplement-Supplementary_Information.pdf [file NIHMS704806-supplement-Supplementary_Information.pdf]

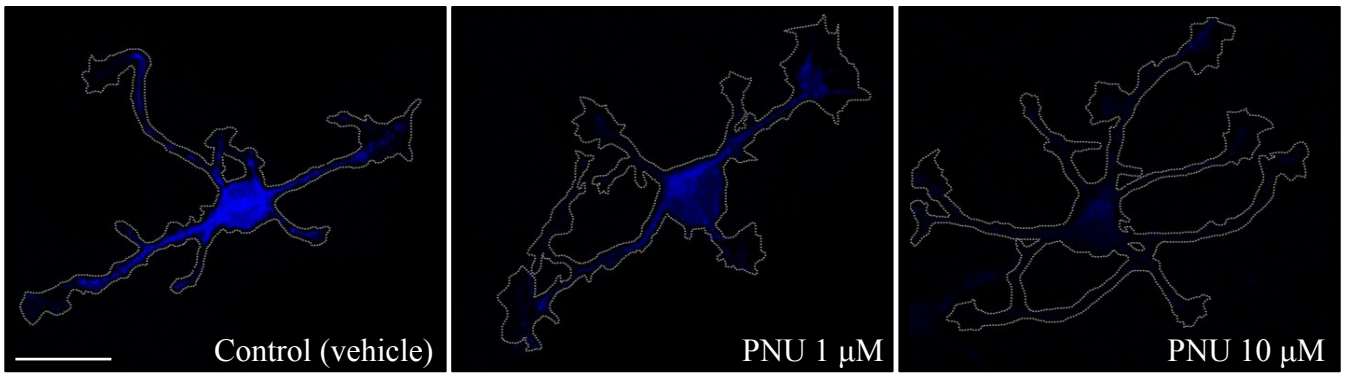

**Supplementary Figure 1:** The Alex-647 Bgtx (fBgtx) signal is in the presence of the selective  $\alpha 7$  agonist PNU282987. Hippocampal neurons were treated with PNU (1 and 10  $\mu\text{M}$ ) for 1 min prior to fixation and labeling with fBgtx. Scale bar: 10  $\mu\text{M}$ .

| <b>Protein Identity</b>               | <b>Peptide Sequence</b>     | <b>Protein Score</b> | <b>MW</b> | <b>Accession</b> | <b>Ion Number</b> |
|---------------------------------------|-----------------------------|----------------------|-----------|------------------|-------------------|
| <b><u><math>\alpha</math>7 IP</u></b> |                             |                      |           |                  |                   |
| $\alpha$ 7                            | RYHHHDPDGGKMPKW             | 8.08                 | 56373.4   | 71896614         | 5                 |
| Gprin1                                | KDLAAVAAQKSPSAEGAAPPPGPRTRD | 20.09                | 85066.5   | 62663260         | 3                 |
| <b><u>Gprin1 IP</u></b>               |                             |                      |           |                  |                   |
| $\alpha$ 7                            | KEPYPDVTYTVTMRRRT           | 12.06                | 56373.4   | 71896614         | 4                 |
| Gprin1                                | KTALVSPGKVDLTASERA          | 22.03                | 85066.5   | 62663260         | 7                 |

**SUPPLEMENTARY TABLE 1.** Confirmation of protein bands in using mass spectrometry. Shown for each protein is the sequence of the most abundant peptide, protein score, predicted molecular weight (MW), accession number in NCBI, and total number of detected ions. Proteins were obtained from a coomassie stained SDS-PAGE gel using in-gel digestion. The samples were analyzed using liquid chromatography electro spray ionization (LC-ESI) mass spectrometry (MS) as described in (Kaiser et al., 2008) and (Nordman and Kabbani, 2012). These MS results validate  $\alpha$ 7 nAChR and Gprin1 protein identities within the IP experiment.

| <b>Protein Identity</b>         | <b>Peptide Sequence</b>             | <b>Protein Score</b> | <b>MW</b> | <b>Accession</b> | <b>Ion Number</b> |
|---------------------------------|-------------------------------------|----------------------|-----------|------------------|-------------------|
| <b><math>\alpha 7</math> IP</b> |                                     |                      |           |                  |                   |
| $\alpha 7$                      | RYHHHDPDGGKMPKW                     | 8.08                 | 56373.4   | 71896614         | 3                 |
| Gprin1                          | KGASETGVRV                          | 20.09                | 85066.5   | 62663260         | 4                 |
| <b>Gprin1 IP</b>                |                                     |                      |           |                  |                   |
| $\alpha 7$                      | MCGGRGGIWLALAAALLHVSLQG             | 12.06                | 56373.4   | 71896614         | 5                 |
| Gprin1                          | KESSASQGKAETVPSGEVGGSTTLGKTASTSSGKT | 22.03                | 85066.5   | 62663260         | 6                 |

**SUPPLEMENTARY TABLE 2.** Confirmation of protein bands using mass spectrometry. Shown for each protein is the sequence of the most abundant peptide, protein score, predicted molecular weight (MW), accession number in NCBI, and total number of detected ions. Proteins were obtained from a coomassie stained SDS-PAGE gel using in-gel digestion. The samples were analyzed using liquid chromatography electro spray ionization (LC-ESI) mass spectrometry (MS) as described in (Kaiser et al., 2008) and (Nordman and Kabbani, 2012). These MS results validate  $\alpha 7$  nAChR and Gprin1 protein identities within the IP experiment from the GC and CF

| Control cells           | <b>SA</b> | <b>Branch</b> | <b>GC#/Cell</b> | <b>Filopodia#/Cell</b> |
|-------------------------|-----------|---------------|-----------------|------------------------|
| <b>SA</b>               | 1.00      | 0.83          | 0.82            | 0.74                   |
| <b>Branch</b>           | 0.83      | 1.00          | 0.65            | 0.66                   |
| <b>GC #/Cell</b>        | 0.82      | 0.65          | 1.00            | 0.67                   |
| <b>Filopodia #/Cell</b> | 0.74      | 0.66          | 0.67            | 1.00                   |
| PNU treated             |           |               |                 |                        |
| <b>SA</b>               | 1.00      | 0.71          | 0.57            | 0.80                   |
| <b>Branch</b>           | 0.71      | 1.00          | 0.47            | 0.56                   |
| <b>GC#/Cell</b>         | 0.57      | 0.47          | 1.00            | 0.66                   |
| <b>Filopodia#/Cell</b>  | 0.80      | 0.56          | 0.66            | 1.00                   |
| PNU + Bgtx treated      |           |               |                 |                        |
| <b>SA</b>               | 1.00      | 0.77          | 0.66            | 0.74                   |
| <b>Branch</b>           | 0.77      | 1.00          | 0.64            | 0.60                   |
| <b>GC#/Cell</b>         | 0.66      | 0.64          | 1.00            | 0.46                   |
| <b>Filopodia#/Cell</b>  | 0.74      | 0.60          | 0.46            | 1.00                   |

**SUPPLEMENTARY TABLE 3.** Pearson's r-values confirming the effect of drug treatment on various parameters of axon growth as presented in Fig. 3 of the manuscript. Values are based on PNU treatment at 10  $\mu$ M and Bgtx treatment at 50 nM. Control cells were treated with 0.1% DMSO (the vehicle). Low r-values are indicated in red.
